# Supplementary material for: Proline Affects Flowering Time in Arabidopsis by Modulating FLC Expression: A Clue of Epigenetic Regulation?
Source: MDPI journal article supplement (doi:10.3390/plants11182348), 2022-09-08
Supplement: s1 [file s1]

**Table S1:** List of PCR primers used in this work:

| Flowering time           |                           |              |                          |
|--------------------------|---------------------------|--------------|--------------------------|
| CO for:                  | tcgtggctgttcctaattc       | CO rev:      | ccctgaggagccatatttga     |
| GI for:                  | gagctgtctttctccgttggtt    | GI rev:      | cttcaatagattggataaaccgtc |
| FWA for:                 | tatgcaccagtggaaaccaa      | FWA rev:     | gagtgcagcagttggattga     |
| LD for:                  | atggaccgcgttcaaggaggagata | LD rev:      | acatgcctccgatgtatagagtt  |
| FPA for:                 | atgggaaaggggattgaaac      | FPA rev:     | ctgatggaggcaccaagaat     |
| FVE for:                 | catcacaacgattgggacag      | FVE rev:     | aaccttcgtgacagggttg      |
| FCA for:                 | catacctcgctgatggatt       | FCA rev:     | aaacggctgctgtaattgct     |
| FY for:                  | caagttttggtgcagaaacagg    | FY rev:      | tgttggctgataaccttgct     |
| FLK for:                 | aggggagtacctggtgaaatga    | FLK rev:     | ggcatctagcgtttccactctt   |
| FLD for:                 | taggaacccatcaaggaatgct    | FLD rev:     | actgaatcagctccaacaccaa   |
| LFY for:                 | acgaaggtgaggatgacgac      | LFY rev:     | catttttcgcacggctcttag    |
| SOC1 for:                | aattcgccagctccaatatg      | SOC1 rev:    | cctcgattgagcatgttcct     |
| FT for:                  | ctggaacaacctttggcaat      | FT rev:      | agccactctccctctgacaa     |
| FLC for:                 | cggctcatcgagaaagctc       | FLC rev:     | tagtcacggagaggcagtc      |
| VRN1 for:                | gggtatgctagttcagccatcc    | VRN1 rev:    | acttctcagcaaaccagaagg    |
| VRN2 for:                | gcttgctggacaatttgatg      | VRN2 rev:    | aacgagttccaaagatgcatga   |
| VIN3 for:                | agcaaaccctttgacaaactc     | VIN3 rev:    | tttgccgcatattgatctcag    |
| GA1 for:                 | gtctcgcggaaatcatcaat      | GA1 rev:     | tgatcgccacataaagcaaa     |
| GA3ox1 for:              | cgatttccgtaaaactttggc     | GA3ox1 rev:  | atccattggataggtgtgg      |
| GA3ox2 for:              | ggcgtagctcgtattgcttc      | GA3ox2 rev:  | tggataactgcttgggttcc     |
| GA3ox3 for:              | ttcagcgtcacgctacactc      | GA3ox3 rev:  | caaaccgggtaggagttcaa     |
| GA3ox4 for:              | cctgacgttaccacctcat       | GA3ox4 rev:  | ttcaatgtcttccacgggtga    |
| GA20ox1 for:             | aaatccggtgagagtgttg       | GA20ox1 rev: | cttagccccagaagctccat     |
| GA20ox2 for:             | tgccaaacaccagatctcac      | GA20ox2 rev: | tcgcgctctctctattcaca     |
| GA2ox1 for:              | atcaatggcggtattgtctaaac   | GA2ox1 rev:  | acctgaagaagccgaagtc      |
| AP1 for:                 | gcaagcaatgagccctaaag      | AP1 rev:     | actgtctctgttgagcccta     |
| CAL for:                 | gaaccaatgagcctcaagga      | CAL rev:     | ttgtggctgtggtacatcgt     |
| ACT for:                 | atgaagattaaggctcgtggca    | ACT rev:     | Tccgagtttgaagaggctac     |
| Flowering time (RT-qPCR) |                           |              |                          |
| CO for:                  | cacgacctgtgacacatgc       | CO rev:      | catggcaatacacgggtgcag    |
| SOC1 for:                | aacgtaaactcttgggagaaggc   | SOC1 rev:    | gcagctcctcgattgagcat     |
| FT for:                  | cttggcaggcaaacagtgtatg    | FT rev:      | agtgttgaagttctggcgcc     |
| FLC for:                 | atgtgggagcagaagctgaga     | FLC rev:     | cggagatttgtccagcaggt     |
| GA1 for:                 | ttcatgcagacccgagacagt     | GA1 rev:     | gacggcatttcgcaaatactc    |
| LFY for:                 | tctgaagggttcacagagtgg     | LFY rev:     | aatgtctcgttgggttcca      |
| AP1 for:                 | ccacaatatgcctccccctc      | AP1 rev:     | ggatgctggatttgggtcgt     |
| CAL for:                 | tgatgccgaggtttccctta      | CAL rev:     | tcgaacaatttgccttatgg     |
| ACT for:                 | cttgaccaagcagcatgaa       | ACT rev:     | ccgatccagacactgtacttctt  |

---

Characterization of *flc-7* and *p5cs1 p5cs2/P5CS2*

|                   |                        |                   |                            |
|-------------------|------------------------|-------------------|----------------------------|
| <i>FLC</i> for:   | caaacaagagctgatgttacaa | <i>FLC</i> rev:   | tagtcacggagagggcagtc       |
| <i>FLC</i> for:   | caaacaagagctgatgttacaa | <i>T-DNA</i> rev: | ataataacgctcggacatctacattt |
| <i>P5CS1</i> for: | ggaaccaccatttgcatttgt  | <i>P5CS1</i> rev: | tctgcaacttcgtatcctctgtc    |
| <i>P5CS1</i> for: | ctgttgggggtaaactcattg  | <i>Lb1</i> rev:   | gcgtggaccgcttctgcaact      |
| <i>P5CS2</i> for: | ggagcagaatggttttctcg   | <i>P5CS2</i> rev: | tggaaaacagcagcactgtc       |
| <i>P5CS2</i> for: | ggagcagaatggttttctcg   | <i>T-DNA</i> rev: | tatctgggaatggcgaaatc       |
